# Supplementary material for: Microhabitat use, population densities, and size distributions of sulfur cave-dwelling Poecilia mexicana
Source: PeerJ. 2014 Jul 15;2:e490. doi: 10.7717/peerj.490 (PMC4106196; doi:10.7717/peerj.490)
Supplement: Supplemental Information 1 [file peerj-02-490-s001.xlsx]

## Sheet: P.mex densities all
site		Cave	Quadrant	ab_ kl1_m2	ab_ kl2_m2	ab_ kl3_m2	ab_all_m2	flow [cm s-1]	flow class	depth [cm]	depth class
4	EA-ex	0	A 1	0	0	0	0	5.2		1.4
4	EA-ex	0	A 2	0	0	0	0	31.2		7.5
4	EA-ex	0	A 3	0	0	0	0	7.2		4.5
4	EA-ex	0	A 4	0	0	0.8	0.8	6.8		2.9
4	EA-ex	0	A 5	0	0	0	0	2.8		7
4	EA-ex	0	B 2	0	0	1.6	1.6	120		7.9
4	EA-ex	0	B 3	0	0	0	0	53.2		7.8
4	EA-ex	0	B 4	0	4	0	4	50.4		8.6
4	EA-ex	0	B 5	0	0	0	0	5.6		16.4
4	EA-ex	0	C 3	0.8	0.8	0	1.6	6		6
4	EA-ex	0	C 4	0	0	0	0	97.2		48.6
4	EA-ex	0	C 5	0	1.6	0	1.6	5.2		6.4
4	EA-ex	0	D 1	0	0	0.8	0.8	27.2		22.4
4	EA-ex	0	D 2	0	0	0	0	1.8		16.1
4	EA-ex	0	D 3	0	0	0	0	3.6		13
4	EA-ex	0	D 4	0	0	0	0	40.4		15.4
4	EA-ex	0	D 5	0	4	0	4	4.4		11.9
4	EA-ex	0	E 1	0	0	0	0	30		13.7
4	EA-ex	0	E 2	0	0	0	0	9.6		11.8
4	EA-ex	0	E 4	0	0	0	0	52.8		6.8
4	EA-ex	0	E 5	0	0	0.8	0.8	4.4		4.4
5	EA-mf	0	A 3	0	0	0.5	0.5	6.2		29
5	EA-mf	0	A 4	0	0	0	0	4		27.6
5	EA-mf	0	D 2	0	0	0	0	5.4		19.9
5	EA-mf	0	E 1	0	0	0	0	4.8		23.9
5	EA-mf	0	E 2	0	0	0	0	4.4		22.2
5	EA-mf	0	E 4	0	0	0	0	3.8		24.4
5	EA-mf	0	B 1	0.5	0.5	1	2	6.2		27.8
5	EA-mf	0	C 3	0	0.5	0	0.5	9		17.4
5	EA-mf	0	D 1	0	0.5	0	0.5	5.4		21.6
5	EA-mf	0	D 4	0	0.5	0.5	1	5.4		18
5	EA-mf	0	A 2	0	1	0	1	6.8		26.2
5	EA-mf	0	C 4	0	1	0	1	7.6		19
5	EA-mf	0	A 1	0	1.5	0	1.5	8.8		24.3
5	EA-mf	0	B 4	0	2.5	0	2.5	7.4		19.6
5	EA-mf	0	D 5	0.5	2.5	0	3	8		16.7
5	EA-mf	0	E 3	0	2.5	0	2.5	4		20.8
5	EA-mf	0	B 3	0	3	0.5	3.5	7.8		15.8
5	EA-mf	0	D 3	0.5	3.5	0.5	4.5	4.8		11.8
5	EA-mf	0	B 5	0	4	1	5	6.8		15
5	EA-mf	0	C 2	1	4.5	0	5.5	11.2		10.6
5	EA-mf	0	E 5	0	5	0	5	5		19.4
5	EA-mf	0	B 2	0	6	1	7	8		18.1
5	EA-mf	0	C 1	0	7.5	0	7.5	7.6		13.4
5	EA-mf	0	A 5	0.5	8.5	2.5	11.5	5.6		19.3
5	EA-mf	0	C 5	0	11	0.5	11.5	7.6		16.2
6	cc	0	A 3	0	0	0	0	120		36
6	cc	0	A 4	0	0	0	0	82		46.6
6	cc	0	A 5	0	0	0	0	32		48
6	cc	0	A 6	2.66667	0	0	2.66667	68.8		46.2
6	cc	0	A 7	0	0	0	0	120		41.2
6	cc	0	B 2	0	0	0	0	51.2		30.2
6	cc	0	B 4	0	0	0	0	38.8		42.8
6	cc	0	C 1	0	0	0.666667	0.666667	73.6		24.4
6	cc	0	C 2	0	0	0.666667	0.666667	120		26.4
6	cc	0	C 5	0	0	0	0	120		36
6	cc	0	D 2	1.33333	0	0	1.33333	120		18.8
6	cc	0	D 3	0	0	0.666667	0.666667	120		19.4
6	cc	0	D 6	1.33333	0	0	1.33333	120		26.7
6	cc	0	D 7	0	0	0	0	120		36.4
6	cc	0	B 5	0	0.666667	0	0.666667	34.8		45.2
6	cc	0	B 6	0.666667	0.666667	0	1.33333	23.6		46.2
6	cc	0	C 6	0	0.666667	0	0.666667	84.4		40.4
6	cc	0	C 7	0.666667	0.666667	0.666667	2	81.2		45
6	cc	0	D 5	1.33333	0.666667	0	2	120		19.5
6	cc	0	B 7	0.666667	1.33333	0.666667	2.66667	36.4		50.4
6	cc	0	C 4	1.33333	1.33333	0	2.66667	112.4		37.5
6	cc	0	D 4	0	1.33333	0.666667	2	120		19.9
6	cc	0	B 1	0	2	0	2	48.8		23.9
6	cc	0	B 3	0	2	0.666667	2.66667	48.4		33.9
6	cc	0	A 1	0.666667	2.66667	0	3.33333	120		23.2
6	cc	0	C 3	0	2.66667	0.666667	3.33333	104.8		30.6
6	cc	0	A 2	0	3.33333	0.666667	4	120		31.8
6	cc	0	D 1	2	4	0.666667	6.66667	120		24.7
7	EA-con	0	E 2	57.6	0	0	57.6	120		22.8
7	EA-con	0	E 4	85.6	0.8	1.6	88	70.8		18.6
7	EA-con	0	E 1	72.8	1.6	0.8	75.2	120		16.8
7	EA-con	0	E 3	104	4	0	108	120		21
7	EA-con	0	A 1	0	4.8	0.8	5.6	4.4		19.7
7	EA-con	0	E 5	41.6	5.6	0	47.2	78.4		11.7
7	EA-con	0	D 3	188	8	0	196	6.8		19.7
7	EA-con	0	A 3	0	8.8	1.6	10.4	4		17.3
7	EA-con	0	D 1	180	8.8	0.8	189.6	10		16.1
7	EA-con	0	A 2	0	9.6	0.8	10.4	4		18.3
7	EA-con	0	B 2	0	16	0	16	4.4		18.8
7	EA-con	0	D 2	304	17.6	1.6	323.2	8		20.9
7	EA-con	0	B 1	0	20	4.8	24.8	4.8		22.3
7	EA-con	0	C 2	12	20	1.6	33.6	4.8		21.9
7	EA-con	0	A 5	0	29.6	0	29.6	4		11.8
7	EA-con	0	B 3	0	30.4	0.8	31.2	5.2		18.4
7	EA-con	0	C 4	24	31.2	5.6	60.8	4		16.3
7	EA-con	0	B 4	1.6	35.2	0.8	37.6	4.4		13.8
7	EA-con	0	A 4	0	39.2	0	39.2	4.4		16
7	EA-con	0	B 5	0	44	0	44	4.4		12.7
7	EA-con	0	C 3	16	44	0.8	60.8	5.2		18.4
7	EA-con	0	D 4	128	52	0	180	5.2		16.1
7	EA-con	0	C 1	8	52.8	0	60.8	5.6		17.7
7	EA-con	0	C 5	0	69.6	0.8	70.4	4.4		13.6
7	EA-con	0	D 5	65.6	74.4	0	140	6		16
1	CV-1	1	A 1	54	187.5	53.5	295	9.2	1	9.3	2
1	CV-1	1	A 2	17	33.5	10.5	61	8	1	6.5	2
1	CV-1	1	A 3	17	36.5	1	54.5	16.72	2	7.7	2
1	CV-1	1	A 4	124.5	66.5	0.5	191.5	30.16	2	6.6	2
1	CV-1	1	A 5	191	65	0.5	256.5	23.2	2	8.4	2
1	CV-1	1	B 1	62	143	48	253	24.4	2	9.1	2
1	CV-1	1	B 2	6	28.5	4	38.5	29.6	2	9.3	2
1	CV-1	1	B 3	74.5	25.5	0.5	100.5	28	2	5.9	2
1	CV-1	1	B 4	252	51	1	304	14.4	2	4.6	1
1	CV-1	1	B 5	287	65.5	0	352.5	15.36	2	7.8	2
1	CV-1	1	C 1	67.5	115	20.5	203	46.4	2	8	2
1	CV-1	1	C 2	7.5	50	7.5	65	6	1	11.4	3
1	CV-1	1	C 3	52.5	17	0	69.5	40	2	6.6	2
1	CV-1	1	C 4	211	32.5	0	243.5	13.6	2	4.7	1
1	CV-1	1	C 5	322.5	57.5	0	380	14.2	2	4.5	1
1	CV-1	1	D 1	62	93	17.5	172.5	75.2	3	13.6	3
1	CV-1	1	D 2	0	32	2	34	4.8	1	8.4	2
1	CV-1	1	D 3	11.5	12	1	24.5	66.8	3	6.6	2
1	CV-1	1	D 4	46.5	3	0.5	50	12.8	2	5.3	2
1	CV-1	1	D 5	123.5	9.5	0.5	133.5	7.6	1	6.8	2
1	CV-1	1	E 1	27.5	26.5	1	55	7.2	1	12.7	3
1	CV-1	1	E 2	0	4	0	4	5.2	1	11.2	3
1	CV-1	1	E 3	0.5	0	0	0.5	7.2	1	6.8	2
1	CV-1	1	E 4	0	1	0.5	1.5	5.2	1	5.7	2
1	CV-1	1	E 5	3.5	1.5	0	5	7.6	1	5.3	2
2	CV-2	1	C 3	206.667	18	2.66667	227.333	16.8	2	1.7	1
2	CV-2	1	A 4	74.6667	19.3333	6	100	23.6	2	1.1	1
2	CV-2	1	C 5	74.6667	23.3333	0	98	76.4	3	0.94	1
2	CV-2	1	C 4	143.333	30	0.666667	174	13.2	2	1.9	1
2	CV-2	1	C 2	200	43.3333	2.66667	246	22	2	1	1
2	CV-2	1	A 1	73.3333	50.6667	2	126	1.8	1	3.5	1
2	CV-2	1	C 1	196.667	64.6667	8	269.333	67.6	3	1.8	1
2	CV-2	1	A 3	150.667	66.6667	5.33333	222.667	19.2	2	0.7	1
2	CV-2	1	B 2	196.667	76.6667	1.33333	274.667	9.6	1	1.1	1
2	CV-2	1	B 5	193.333	76.6667	2	272	15.2	2	1.2	1
2	CV-2	1	B 4	213.333	79.3333	0	292.667	14.8	2	1.9	1
2	CV-2	1	A 5	193.333	80	18	291.333	78	3	2.2	1
2	CV-2	1	B 1	170	83.3333	8	261.333	100.8	3	1.6	1
2	CV-2	1	A 2	128.667	94.6667	4	227.333	76.8	3	0.9	1
2	CV-2	1	B 3	243.333	130	0.666667	374	13.2	2	1.2	1
3	CV-3	1	A 1	1.33333	1.33333	0	2.66667	2.4	1	0.7	1
3	CV-3	1	B 4	2.66667	1.33333	0.666667	4.66667	3.2	1	6.9	2
3	CV-3	1	A 4	115.333	14	2.66667	132	3	1	2.3	1
3	CV-3	1	A 3	40.6667	61.3333	18	120	30.4	2	3.8	1
3	CV-3	1	B 2	60	62	17.3333	139.333	10.4	1	4.1	1
3	CV-3	1	B 1	84	65.3333	20	169.333	4.8	1	1.5	1
3	CV-3	1	B 3	75.3333	84	14.6667	174	13.6	2	6.7	2
3	CV-3	1	A 2	96.6667	126.667	18	241.333	23.2	2	2.8	1
8	CX	1	E 5	0.666667	20	3.33333	24	4	1	7.6	2
8	CX	1	E 1	1.33333	28.6667	43.3333	73.3333	30.8	2	11.1	3
8	CX	1	E 2	1.33333	46	31.3333	78.6667	6	1	8.4	2
8	CX	1	D 5	2	14.6667	8	24.6667	4.4	1	6.9	2
8	CX	1	E 3	2	42.6667	34	78.6667	42.8	2	8.7	2
8	CX	1	E 4	2	30	21.3333	53.3333	3.6	1	7.9	2
8	CX	1	C 5	2.66667	12.6667	8	23.3333	8.8	1	7.05	2
8	CX	1	C 4	4	8	4.66667	16.6667	14.8	2	5.4	2
8	CX	1	D 1	4	50	36	90	5.6	1	7.3	2
8	CX	1	D 3	4	17.3333	4.66667	26	25.2	2	6.1	2
8	CX	1	D 4	4	14	12.6667	30.6667	7.6	1	7.2	2
8	CX	1	A 4	4.66667	4.66667	2.66667	12	8.8	1	4.5	1
8	CX	1	B 5	5.33333	4	6	15.3333	13.6	2	6.7	2
8	CX	1	C 1	5.33333	27.3333	12	44.6667	11.6	2	7.9	2
8	CX	1	B 3	6	12	1.33333	19.3333	4.8	1	5.9	2
8	CX	1	A 3	6.66667	8	4.66667	19.3333	9.2	1	5.7	2
8	CX	1	A 5	6.66667	4.66667	5.33333	16.6667	12	2	4.3	1
8	CX	1	B 4	6.66667	5.33333	2	14	23.6	2	5.1	2
8	CX	1	B 2	7.33333	12.6667	6.66667	26.6667	6.4	1	6.9	2
8	CX	1	A 1	8	10.6667	2.66667	21.3333	16	2	5.9	2
8	CX	1	C 3	8	6.66667	6.66667	21.3333	9.6	1	5.4	2
8	CX	1	D 2	9.33333	41.3333	21.3333	72	4.8	1	5.9	2
8	CX	1	A 2	10	12	5.33333	27.3333	8.8	1	6.7	2
8	CX	1	B 1	16.6667	26.6667	12	55.3333	9.6	1	6.4	2
8	CX	1	C 2	16.6667	23.3333	9.33333	49.3333	5.6	1	6.6	2

## Sheet: EA-ex
		2010-01-10					2010-01-11					2010-01-12					2010-01-13					2010-01-13					MITTELWERTE
		Uhrzeit 12:20:00	Größenkategorie Poecilia mexicana				Uhrzeit 13:30:00	Größenkategorie Poecilia mexicana				Uhrzeit 15:30:00	Größenkategorie Poecilia mexicana				Uhrzeit 11:45:00	Größenkategorie Poecilia mexicana				Uhrzeit 14:30:00	Größenkategorie Poecilia mexicana					Größenkategorie Poecilia mexicana
		Quadrant	< 1 cm	1 - 3 cm	> 3 cm		Quadrant	< 1 cm	1 - 3 cm	> 3 cm		Quadrant	< 1 cm	1 - 3 cm	> 3 cm		Quadrant	< 1 cm	1 - 3 cm	> 3 cm		Quadrant	< 1 cm	1 - 3 cm	> 3 cm		Quadrant	< 1 cm	1 - 3 cm	> 3 cm
		A 1	0	0	0		A 1	0	0	0		A 1	0	0	0		A 1	0	0	0		A 1	0	0	0		A 1	0	0	0
		A 2	0	0	0		A 2	0	0	0		A 2	0	0	0		A 2	0	0	0		A 2	0	0	0		A 2	0	0	0
		A 3	0	0	0		A 3	0	0	0		A 3	0	0	0		A 3	0	0	0		A 3	0	0	0		A 3	0	0	0
		A 4	0	0	0		A 4	0	0	0		A 4	0	0	0		A 4	0	0	0		A 4	0	0	1		A 4	0	0	0.2
		A 5	0	0	0		A 5	0	0	0		A 5	0	0	0		A 5	0	0	0		A 5	0	0	0		A 5	0	0	0
		B 1					B 1					B 1					B 1					B 1					B 1
		B 2	0	0	0		B 2	0	0	0		B 2	0	0	2		B 2	0	0	0		B 2	0	0	0		B 2	0	0	0.4
		B 3	0	0	0		B 3	0	0	0		B 3	0	0	0		B 3	0	0	0		B 3	0	0	0		B 3	0	0	0
		B 4	0	1	0		B 4	0	0	0		B 4	0	0	0		B 4	0	0	0		B 4	0	4	0		B 4	0	1	0
		B 5	0	0	0		B 5	0	0	0		B 5	0	0	0		B 5	0	0	0		B 5	0	0	0		B 5	0	0	0
		C 1					C 1					C 1					C 1					C 1					C 1
		C 2					C 2					C 2					C 2					C 2					C 2
		C 3	0	1	0		C 3	0	0	0		C 3	0	0	0		C 3	0	0	0		C 3	1	0	0		C 3	0.2	0.2	0
		C 4	0	0	0		C 4	0	0	0		C 4	0	0	0		C 4	0	0	0		C 4	0	0	0		C 4	0	0	0
		C 5	0	2	0		C 5	0	0	0		C 5	0	0	0		C 5	0	0	0		C 5	0	0	0		C 5	0	0.4	0
		D 1	0	0	0		D 1	0	0	0		D 1	0	0	0		D 1	0	0	0		D 1	0	0	1		D 1	0	0	0.2
		D 2	0	0	0		D 2	0	0	0		D 2	0	0	0		D 2	0	0	0		D 2	0	0	0		D 2	0	0	0
		D 3	0	0	0		D 3	0	0	0		D 3	0	0	0		D 3	0	0	0		D 3	0	0	0		D 3	0	0	0
		D 4	0	0	0		D 4	0	0	0		D 4	0	0	0		D 4	0	0	0		D 4	0	0	0		D 4	0	0	0
		D 5	0	3	0		D 5	0	0	0		D 5	0	2	0		D 5	0	0	0		D 5	0	0	0		D 5	0	1	0
		E 1	0	0	0		E 1	0	0	0		E 1	0	0	0		E 1	0	0	0		E 1	0	0	0		E 1	0	0	0
		E 2	0	0	0		E 2	0	0	0		E 2	0	0	0		E 2	0	0	0		E 2	0	0	0		E 2	0	0	0
		E 3					E 3					E 3					E 3					E 3					E 3
		E 4	0	0	0		E 4	0	0	0		E 4	0	0	0		E 4	0	0	0		E 4	0	0	0		E 4	0	0	0
		E 5	0	0	1		E 5	0	0	0		E 5	0	0	0		E 5	0	0	0		E 5	0	0	0		E 5	0	0	0.2
		Flow velocity							Depth
		1	2	3	4	5	Mean		1	2	3	4	5	Mean
	A 1	2	3	3	2	3	2.6		2	1	1	1	2	1.4
	A 2	5	60	6	4	3	15.6		9.5	6	11	5	6	7.5
	A 3	3	5	3	4	3	3.6		4.5	5	3	4	6	4.5						< 1 cm	1 - 3 cm	> 3 cm		flow	depth
	A 4	4	3	3	3	4	3.4		4.5	2.5	2	2	3.5	2.9					A 1	0	0	0	0	2.6	1.4
	A 5	1	1	2	1	2	1.4		4.5	11	15	3	1.5	7					A 2	0	0	0	0	15.6	7.5
	B 1													0					A 3	0	0	0	0	3.6	4.5
	B 2	60	60	60	60	60	60		6	8	5.5	16	4	7.9					A 4	0	0	0.2	0.2	3.4	2.9
	B 3	60	60	6	4	3	26.6		10	11	4	6	8	7.8					A 5	0	0	0	0	1.4	7
	B 4	1	2	60	60	3	25.2		10	9	9	8	7	8.6					B 2	0	0	0.4	0.4	60	7.9
	B 5	2	4	2	4	2	2.8		22	16.5	11	22	10.5	16.4					B 3	0	0	0	0	26.6	7.8
	C 1													0					B 4	0	1	0	1	25.2	8.6
	C 2													0					B 5	0	0	0	0	2.8	16.4
	C 3	2	4	6	2	1	3		5	5.5	5.5	5	9	6					C 3	0.2	0.2	0	0.4	3	6
	C 4	60	3	60	60	60	48.6		67	61	59	10	46	48.6					C 4	0	0	0	0	48.6	48.6
	C 5	2	2	3	3	3	2.6		3	2	5	12.5	9.5	6.4					C 5	0	0.4	0	0.4	2.6	6.4
	D 1	2	2	2	2	60	13.6		25	26	35	5	21	22.4					D 1	0	0	0.2	0.2	13.6	22.4
	D 2	1	1	1	0.5	1	0.9		16	16.5	18	10	20	16.1					D 2	0	0	0	0	0.9	16.1
	D 3	2	1	3	2	1	1.8		10	6	14	15	20	13					D 3	0	0	0	0	1.8	13
	D 4	60	30	3	4	4	20.2		11	11	16	20	19	15.4					D 4	0	0	0	0	20.2	15.4
	D 5	2	2	2	3	2	2.2		15	17	16	6	5.5	11.9					D 5	0	1	0	1	2.2	11.9
	E 1	5	3	3	4	60	15		17	21	3.5	13	14	13.7					E 1	0	0	0	0	15	13.7
	E 2	5	5	3	5	6	4.8		13	11	7	9	19	11.8					E 2	0	0	0	0	4.8	11.8
	E 3													0					E 4	0	0	0	0	26.4	6.8
	E 4	60	4	6	60	2	26.4		5	8	6	7	8	6.8					E 5	0	0	0.2	0.2	2.2	4.4
	E 5	1	2	4	2	2	2.2		7.5	0.5	3	7	4	4.4
																			A 1	0	0	0	0	5.2	1.4
																			A 2	0	0	0	0	31.2	7.5
																			A 3	0	0	0	0	7.2	4.5
																			A 4	0	0	0.8	0.8	6.8	2.9
																			A 5	0	0	0	0	2.8	7
																			B 2	0	0	1.6	1.6	120	7.9
																			B 3	0	0	0	0	53.2	7.8
																			B 4	0	4	0	4	50.4	8.6
																			B 5	0	0	0	0	5.6	16.4
																			C 3	0.8	0.8	0	1.6	6	6
																			C 4	0	0	0	0	97.2	48.6
																			C 5	0	1.6	0	1.6	5.2	6.4
																			D 1	0	0	0.8	0.8	27.2	22.4
																			D 2	0	0	0	0	1.8	16.1
																			D 3	0	0	0	0	3.6	13
																			D 4	0	0	0	0	40.4	15.4
																			D 5	0	4	0	4	4.4	11.9
																			E 1	0	0	0	0	30	13.7
																			E 2	0	0	0	0	9.6	11.8
																			E 4	0	0	0	0	52.8	6.8
																			E 5	0	0	0.8	0.8	4.4	4.4

## Sheet: CV-1
	2010-01-09					2010-01-10						2010-01-10						2010-01-11						2010-01-11						2010-01-12						2010-01-13						2010-01-13						MITTELWERTE
	Uhrzeit 14:30:00	Größenkategorie Poecilia mexicana				Uhrzeit 12:20:00	Größenkategorie Poecilia mexicana					Uhrzeit 16:20:00	Größenkategorie Poecilia mexicana					Uhrzeit 13:20:00	Größenkategorie Poecilia mexicana					Uhrzeit 16:00:00	Größenkategorie Poecilia mexicana					Uhrzeit 14:18:00	Größenkategorie Poecilia mexicana					Uhrzeit 12:15:00	Größenkategorie Poecilia mexicana					Uhrzeit 15:30:00	Größenkategorie Poecilia mexicana						Größenkategorie Poecilia mexicana
5 * 5 Quadranten a 0.5 m * 0.5 m	Quadrant	< 1 cm	1 - 3 cm	> 3 cm		Quadrant	< 1 cm	1 - 3 cm	> 3 cm	Belostoma		Quadrant	< 1 cm	1 - 3 cm	> 3 cm	Belostoma		Quadrant	< 1 cm	1 - 3 cm	> 3 cm	Belostoma		Quadrant	< 1 cm	1 - 3 cm	> 3 cm	Belostoma		Quadrant	< 1 cm	1 - 3 cm	> 3 cm	Belostoma		Quadrant	< 1 cm	1 - 3 cm	> 3 cm	Belostoma		Quadrant	< 1 cm	1 - 3 cm	> 3 cm	Belostoma		Quadrant	< 1 cm
	A 1	2	40	0		A 1	20	40	2	0		A 1	8	50	13	0		A 1	13	90	25	0		A 1	20	40	25	0		A 1	0	15	2	0		A 1	30	50	15	0		A 1	15	50	25	0		A 1	13.5
	A 2	1	1	0		A 2	4	10	3	0		A 2	5	15	3	0		A 2	1	2	0	0		A 2	15	20	2	0		A 2	0	5	8	0		A 2	5	10	1	0		A 2	3	4	4	0		A 2	4.25
	A 3	3	1	0		A 3	0	7	0	0		A 3	0	10	0	0		A 3	0	20	0	0		A 3	0	7	0	0		A 3	0	5	0	0		A 3	1	3	0	0		A 3	30	20	2	0		A 3	4.25
	A 4	26	0	0		A 4	20	20	0	0		A 4	10	20	0	0		A 4	3	18	0	0		A 4	40	30	0	0		A 4	30	0	0	0		A 4	60	25	1	0		A 4	60	20	0	0		A 4	31.125
	A 5	12	0	0		A 5	80	20	0	0		A 5	30	20	0	0		A 5	10	30	0	0		A 5	50	10	0	0		A 5	60	0	0	0		A 5	60	30	1	0		A 5	80	20	0	0		A 5	47.75
	B 1	15	30	0		B 1	5	40	0	0		B 1	4	30	8	0		B 1	10	60	25	0		B 1	30	50	30	0		B 1	0	6	1	0		B 1	30	30	12	0		B 1	30	40	20	0		B 1	15.5
	B 2	1	0	0		B 2	0	5	0	0		B 2	5	20	0	0		B 2	0	3	0	0		B 2	1	3	0	0		B 2	0	7	0	0		B 2	5	15	8	0		B 2	0	4	0	0		B 2	1.5
	B 3	5	0	0		B 3	15	5	0	0		B 3	6	4	0	0		B 3	1	0	0	0		B 3	30	10	0	0		B 3	17	2	1	0		B 3	15	10	0	0		B 3	60	20	0	0		B 3	18.625
	B 4	30	1	0		B 4	40	15	0	0		B 4	10	20	1	0		B 4	110	10	0	0		B 4	100	40	1	0		B 4	14	1	0	0		B 4	100	0	0	0		B 4	100	15	0	0		B 4	63
	B 5	14	0	0		B 5	100	7	0	0		B 5	100	30	0	0		B 5	40	40	0	0		B 5	50	5	0	0		B 5	120	9	0	0		B 5	50	20	0	0		B 5	100	20	0	0		B 5	71.75
	C 1	30	50	0		C 1	20	15	2	0		C 1	5	50	5	0		C 1	0	30	15	0		C 1	30	40	10	0		C 1	20	0	2	0		C 1	10	5	0	0		C 1	20	40	7	0		C 1	16.875
	C 2	0	3	0		C 2	0	1	0	0		C 2	0	15	0	0		C 2	0	0	0	0		C 2	0	1	0	0		C 2	0	50	3	0		C 2	5	5	4	0		C 2	10	25	8	0		C 2	1.875
	C 3	1	0	0		C 3	2	1	0	0		C 3	0	5	0	0		C 3	6	0	0	0		C 3	15	5	0	0		C 3	1	3	0	0		C 3	40	5	0	0		C 3	40	15	0	0		C 3	13.125
	C 4	32	0	0		C 4	50	10	0	0		C 4	60	10	0	0		C 4	35	15	0	0		C 4	30	5	0	0		C 4	15	0	0	0		C 4	100	15	0	0		C 4	100	10	0	0		C 4	52.75
	C 5	25	0	0		C 5	100	0	0	0		C 5	30	10	0	0		C 5	110	40	0	0		C 5	100	20	0	0		C 5	100	0	0	0		C 5	80	15	0	0		C 5	100	30	0	0		C 5	80.625
	D 1	20	30	2		D 1	25	10	1	0		D 1	10	60	6	0		D 1	5	20	4	0		D 1	30	20	5	0		D 1	0	1	1	0		D 1	4	5	1	0		D 1	30	40	15	0		D 1	15.5
	D 2	0	0	0		D 2	0	2	0	0		D 2	0	0	0	0		D 2	0	0	0	0		D 2	0	3	0	0		D 2	0	50	2	0		D 2	0	4	0	0		D 2	0	5	2	0		D 2	0
	D 3	1	0	0		D 3	2	0	0	0		D 3	0	0	0	0		D 3	0	0	0	0		D 3	0	1	0	0		D 3	0	20	2	0		D 3	0	0	0	0		D 3	20	3	0	0		D 3	2.875
	D 4	16	0	0		D 4	15	0	0	0		D 4	30	0	1	0		D 4	0	0	0	0		D 4	0	0	0	0		D 4	0	0	0	0		D 4	2	4	0	0		D 4	30	2	0	0		D 4	11.625
	D 5	5	0	0		D 5	9	0	0	0		D 5	100	6	0	0		D 5	7	1	1	0		D 5	15	0	0	0		D 5	1	0	0	0		D 5	30	2	0	0		D 5	80	10	0	0		D 5	30.875
	E 1	10	20	0		E 1	0	0	0	0		E 1	40	20	2	0		E 1	0	0	0	0		E 1	0	2	0	0		E 1	0	8	0	0		E 1	0	1	0	0		E 1	5	2	0	0		E 1	6.875
	E 2	0	2	0		E 2	0	0	0	0		E 2	0	0	0	0		E 2	0	0	0	0		E 2	0	0	0	0		E 2	0	6	0	0		E 2	0	0	0	0		E 2	0	0	0	0		E 2	0
	E 3	1	0	0		E 3	0	0	0	0		E 3	0	0	0	0		E 3	0	0	0	0		E 3	0	0	0	0		E 3	0	0	0	1		E 3	0	0	0	0		E 3	0	0	0	0		E 3	0.125
	E 4	0	0	0		E 4	0	0	0	0		E 4	0	0	0	0		E 4	0	2	1	0		E 4	0	0	0	0		E 4	0	0	0	0		E 4	0	0	0	0		E 4	0	0	0	0		E 4	0
	E 5	0	0	0		E 5	0	0	0	0		E 5	7	2	0	0		E 5	0	0	0	0		E 5	0	1	0	0		E 5	0	0	0	0		E 5	0	0	0	1		E 5	0	0	0	0		E 5	0.875
	Flow velocity							Depth
	1	2	3	4	5	Mean		1	2	3	4	5	Mean
A 1	5	4	5	4	5	4.6		12	11	3.5	8.5	11.5	9.3
A 2	4	4	4	4	4	4		2	1	12	13	4.5	6.5
A 3	1.5	16.5	4.8	11	8	8.36		7	12	4	8	7.5	7.7
A 4	3.3	3.7	60	4.2	4.2	15.08		9	11	2	7	4	6.6
A 5	18	6	6	8	20	11.6		7	8	8	11	8	8.4
B 1	9	6	22	7	17	12.2		4	11	6	12	12.5	9.1
B 2	60	3	3	4	4	14.8		11	9.5	9.5	5.5	11	9.3
B 3	12	11	13	19	15	14		7	6.5	8.5	1.5	6	5.9
B 4	5	7	6	8	10	7.2		3	5	5.5	6	3.5	4.6
B 5	5.7	7.8	5	9.5	10.4	7.68		9	10.5	8.5	10	1	7.8
C 1	5	60	19	8	24	23.2		1	10.5	12	5.5	11	8
C 2	3	3	3	2	4	3		13	10	10	13	11	11.4
C 3	24	19	8	28	21	20		6.5	7	7	6.5	6	6.6
C 4	8	5	5	6	10	6.8		5	4	5	6	3.5	4.7
C 5	6	8	8	8	5.5	7.1		8	2	2.5	3	7	4.5
D 1	4	60	60	4	60	37.6		13.5	14	14.5	11	15	13.6
D 2	3	2	2	3	2	2.4		2	7	9	12	12	8.4
D 3	60	10	60	9	28	33.4		6	5	8	7	7	6.6
D 4	5	6	10	5	6	6.4		5.5	6	6.5	1.5	7	5.3
D 5	3	3	4	4	5	3.8		6.5	7.5	5	8	7	6.8
E 1	3	4	4	4	3	3.6		12	14	10	13	14.5	12.7
E 2	2	3	3	3	2	2.6		13.5	13	9	8	12.5	11.2
E 3	3	4	4	4	3	3.6		8.5	7	6	6	6.5	6.8
E 4	2	3	3	3	2	2.6		5	6	7.5	3.5	6.5	5.7
E 5	4	3	5	4	3	3.8		5	5	8	2	6.5	5.3
[truncated: 2 more columns]

## Sheet: CV-2
		2010-01-10						2010-01-11						2010-01-11						2010-01-12						2010-01-13						2010-01-14						MITTELWERTE
		Uhrzeit 12:20:00	Größenkategorie Poecilia mexicana					Uhrzeit 14:05:00	Größenkategorie Poecilia mexicana					Uhrzeit 16:20:00	Größenkategorie Poecilia mexicana					Uhrzeit 15:49:00	Größenkategorie Poecilia mexicana					Uhrzeit 13:15:00	Größenkategorie Poecilia mexicana					Uhrzeit 14:30:00	Größenkategorie Poecilia mexicana						Größenkategorie Poecilia mexicana
		Quadrant	< 1 cm	1 - 3 cm	> 3 cm	Belostoma		Quadrant	< 1 cm	1 - 3 cm	> 3 cm	Belostoma		Quadrant	< 1 cm	1 - 3 cm	> 3 cm	Belostoma		Quadrant	< 1 cm	1 - 3 cm	> 3 cm	Belostoma		Quadrant	< 1 cm	1 - 3 cm	> 3 cm	Belostoma		Quadrant	< 1 cm	1 - 3 cm	> 3 cm	Belostoma		Quadrant	< 1 cm	1 - 3 cm	> 3 cm
		A 1	0	3	3	0		A 1	10	0	0	0		A 1	60	30	0	0		A 1	10	30	0	0		A 1	20	3	0	0		A 1	10	10	0	0		A 1	18.3333	12.6667	0.5
		A 2	33	7	1	0		A 2	40	0	0	0		A 2	10	5	0	0		A 2	20	80	1	0		A 2	70	40	4	0		A 2	20	10	0	0		A 2	32.1667	23.6667	1
		A 3	56	15	1	0		A 3	30	10	1	0		A 3	40	30	4	0		A 3	10	20	0	0		A 3	60	15	2	0		A 3	30	10	0	0		A 3	37.6667	16.6667	1.33333
		A 4	17	7	1	0		A 4	20	2	0	0		A 4	40	10	7	0		A 4	5	5	0	0		A 4	20	5	1	0		A 4	10	0	0	0		A 4	18.6667	4.83333	1.5
		A 5	20	40	2	0		A 5	30	0	0	0		A 5	30	10	15	0		A 5	40	40	0	0		A 5	70	20	10	0		A 5	100	10	0	0		A 5	48.3333	20	4.5
		B 1	35	25	3	0		B 1	80	40	5	0		B 1	50	30	3	0		B 1	0	0	0	0		B 1	40	20	1	0		B 1	50	10	0	0		B 1	42.5	20.8333	2
		B 2	80	20	1	0		B 2	30	10	1	0		B 2	40	20	0	0		B 2	15	15	0	0		B 2	80	40	0	0		B 2	50	10	0	0		B 2	49.1667	19.1667	0.333333
		B 3	60	25	0	0		B 3	65	65	0	0		B 3	40	40	0	0		B 3	30	20	0	0		B 3	100	40	1	0		B 3	70	5	0	0		B 3	60.8333	32.5	0.166667
		B 4	90	13	0	0		B 4	50	1	0	0		B 4	10	50	0	0		B 4	30	30	0	0		B 4	100	20	0	0		B 4	40	5	0	0		B 4	53.3333	19.8333	0
		B 5	60	15	1	0		B 5	10	50	0	0		B 5	60	15	0	0		B 5	30	20	0	0		B 5	100	10	2	0		B 5	30	5	0	0		B 5	48.3333	19.1667	0.5
		C 1	50	50	4	0		C 1	10	0	0	0		C 1	100	10	3	0		C 1	5	2	0	0		C 1	100	30	5	0		C 1	30	5	0	1		C 1	49.1667	16.1667	2
		C 2	100	5	2	0		C 2	20	10	0	0		C 2	80	20	1	0		C 2	0	0	0	0		C 2	80	20	0	0		C 2	20	10	1	0		C 2	50	10.8333	0.666667
		C 3	60	7	0	0		C 3	105	5	0	0		C 3	50	0	3	0		C 3	20	5	0	1		C 3	60	10	1	0		C 3	15	0	0	0		C 3	51.6667	4.5	0.666667
		C 4	30	5	0	1		C 4	40	0	1	0		C 4	30	0	0	2		C 4	60	40	0	0		C 4	40	0	0	1		C 4	15	0	0	0		C 4	35.8333	7.5	0.166667
		C 5	40	0	0	1		C 5	2	0	0	0		C 5	14	0	0	0		C 5	40	30	0	0		C 5	15	5	0	0		C 5	1	0	0	0		C 5	18.6667	5.83333	0
		Flow velocity							Depth
		1	2	3	4	5	Mean		1	2	3	4	5	Mean
	A 1	0.5	0.5	0.5	1	2	0.9		3	5.5	1.5	1	6.5	3.5
	A 2	9	60	60	3	60	38.4		1.5	0.5	1	1	0.5	0.9
	A 3	8	11	13	9	7	9.6		0.5	0.5	1	1	0.5	0.7
	A 4	5	5	10	33	6	11.8		0.5	1	2	1.5	0.5	1.1
	A 5	60	60	7	60	8	39		6	2	1.5	1	0.5	2.2
	B 1	12	60	60	60	60	50.4		1.5	1	3	1	1.5	1.6
	B 2	3	4	6	4	7	4.8		0.5	1.5	1	1.5	1	1.1
	B 3	9	5	4	7	8	6.6		1	2	0.5	1	1.5	1.2
	B 4	6	8	13	5	5	7.4		3.5	2	1.5	2	0.5	1.9
	B 5	8	9	8	5	8	7.6		2	0.5	1	1	1.5	1.2
	C 1	21	24	60	4	60	33.8		3	1.5	1	2	1.5	1.8
	C 2	10	20	10	7	8	11		2	1	0.5	0.5	1	1
	C 3	10	9	6	9	8	8.4		2.5	0.5	2.5	2	1	1.7
	C 4	8	8	7	5	5	6.6		3	1	3	1	1.5	1.9
	C 5	60	60	4	7	60	38.2		0.2	1	0.5	1.5	1.5	0.94

## Sheet: CV-3
		2010-01-10						2010-01-11						2010-01-11						2010-01-12						2010-01-13						2010-01-14						MITTELWERTE
		Uhrzeit 16:00:00	Größenkategorie Poecilia mexicana					Uhrzeit 14:50:00	Größenkategorie Poecilia mexicana					Uhrzeit 16:35:00	Größenkategorie Poecilia mexicana					Uhrzeit 15:39:00	Größenkategorie Poecilia mexicana					Uhrzeit 14:54:00	Größenkategorie Poecilia mexicana					Uhrzeit 14:45:00	Größenkategorie Poecilia mexicana						Größenkategorie Poecilia mexicana
		Quadrant	< 1 cm	1 - 3 cm	> 3 cm	Belostoma		Quadrant	< 1 cm	1 - 3 cm	> 3 cm	Belostoma		Quadrant	< 1 cm	1 - 3 cm	> 3 cm	Belostoma		Quadrant	< 1 cm	1 - 3 cm	> 3 cm	Belostoma		Quadrant	< 1 cm	1 - 3 cm	> 3 cm	Belostoma		Quadrant	< 1 cm	1 - 3 cm	> 3 cm	Belostoma		Quadrant	< 1 cm	1 - 3 cm	> 3 cm
		A 1	0	0	0	0		A 1	0	1	0	0		A 1	0	0	0	0		A 1	0	0	0	0		A 1	0	0	0	1		A 1	2	1	0	0		A 1	0.333333	0.333333	0
		A 2	15	60	2	0		A 2	20	45	5	0		A 2	25	40	6	0		A 2	15	5	3	0		A 2	40	25	8	4	1gr + 3 kl	A 2	30	15	3	0		A 2	24.1667	31.6667	4.5
		A 3	9	5	2	0		A 3	10	20	5	1		A 3	10	30	9	0		A 3	2	12	5	0		A 3	20	10	4	1		A 3	10	15	2	0		A 3	10.1667	15.3333	4.5
		A 4	20	1	0	0		A 4	40	0	0	0		A 4	30	15	0	0		A 4	13	0	1	0		A 4	40	5	2	0		A 4	30	0	1	0		A 4	28.8333	3.5	0.666667
		B 1	10	15	4	0		B 1	15	25	0	0		B 1	30	25	15	0		B 1	1	8	5	0		B 1	50	20	4	0		B 1	20	5	2	1		B 1	21	16.3333	5
		B 2	10	5	1	0		B 2	0	5	1	0		B 2	10	30	7	0		B 2	10	3	2	0		B 2	40	30	12	0		B 2	20	20	3	0		B 2	15	15.5	4.33333
		B 3	20	50	5	0		B 3	30	20	3	0		B 3	30	30	8	0		B 3	3	1	0	0		B 3	15	5	1	0		B 3	15	20	5	0		B 3	18.8333	21	3.66667
		B 4	0	0	1	0		B 4	0	1	0	0		B 4	4	1	0	0		B 4	0	0	0	0		B 4	0	0	0	0		B 4	0	0	0	0		B 4	0.666667	0.333333	0.166667
		Flow velocity							Depth
		1	2	3	4	5	Mean		1	2	3	4	5	Mean
	A 1	1	1	2	1	1	1.2		0.5	1	0.5	1	0.5	0.7
	A 2	19	7	2	3	27	11.6		1	2.5	3	4	3.5	2.8
	A 3	60	2	10	1	3	15.2		9	3.5	2	0.5	4	3.8
	A 4	0.5	2	1	3	1	1.5		1.5	1	1	3.5	4.5	2.3
	B 1	3	2	2	3	2	2.4		2	1	1.5	2	1	1.5
	B 2	6	11	2	3	4	5.2		3	5	4	4	4.5	4.1
	B 3	10	7	16	0.5	0.5	6.8		1	6	16	1.5	9	6.7
	B 4	2	1	1	1	3	1.6		14.5	9	6	0.5	4.5	6.9

## Sheet: EA-mf
	2010-01-11					2010-01-11					2010-01-12					2010-01-12					2010-01-13					2010-01-13					2010-01-14					2010-01-14					MITTELWERTE
	Uhrzeit 14:40:00	Größenkategorie Poecilia mexicana				Uhrzeit 16:15:00	Größenkategorie Poecilia mexicana				Uhrzeit 12:05	Größenkategorie Poecilia mexicana				Uhrzeit 15:20:00	Größenkategorie Poecilia mexicana				Uhrzeit 12:33:00	Größenkategorie Poecilia mexicana				Uhrzeit 15:11:00	Größenkategorie Poecilia mexicana				Uhrzeit 12:45:00	Größenkategorie Poecilia mexicana				Uhrzeit 14:51:00	Größenkategorie Poecilia mexicana					Größenkategorie Poecilia mexicana
	Quadrant	< 1 cm	1 - 3 cm	> 3 cm		Quadrant	< 1 cm	1 - 3 cm	> 3 cm		Quadrant	< 1 cm	1 - 3 cm	> 3 cm		Quadrant	< 1 cm	1 - 3 cm	> 3 cm		Quadrant	< 1 cm	1 - 3 cm	> 3 cm		Quadrant	< 1 cm	1 - 3 cm	> 3 cm		Quadrant	< 1 cm	1 - 3 cm	> 3 cm		Quadrant	< 1 cm	1 - 3 cm	> 3 cm		Quadrant	< 1 cm	1 - 3 cm	> 3 cm
	A 1	0	0	0		A 1	0	0	0		A 1	0	0	0		A 1	0	0	0		A 1	0	0	0		A 1	0	0	0		A 1	0	1	0		A 1	0	2	0		A 1	0	0.375	0
	A 2	0	0	0		A 2	0	0	0		A 2	0	0	0		A 2	0	0	0		A 2	0	0	0		A 2	0	0	0		A 2	0	2	0		A 2	0	0	0		A 2	0	0.25	0
	A 3	0	0	0		A 3	0	0	0		A 3	0	0	0		A 3	0	0	0		A 3	0	0	0		A 3	0	0	0		A 3	0	0	1		A 3	0	0	0		A 3	0	0	0.125
	A 4	0	0	0		A 4	0	0	0		A 4	0	0	0		A 4	0	0	0		A 4	0	0	0		A 4	0	0	0		A 4	0	0	0		A 4	0	0	0		A 4	0	0	0
	A 5	0	0	0		A 5	0	0	0		A 5	0	0	0		A 5	1	0	0		A 5	0	0	1		A 5	0	5	1		A 5	0	10	0		A 5	0	2	3		A 5	0.125	2.125	0.625
	B 1	0	0	0		B 1	0	0	0		B 1	0	0	0		B 1	0	1	0		B 1	0	0	0		B 1	0	0	0		B 1	1	0	2		B 1	0	0	0		B 1	0.125	0.125	0.25
	B 2	0	0	0		B 2	0	0	0		B 2	0	1	0		B 2	0	0	0		B 2	0	0	0		B 2	0	10	0		B 2	0	1	2		B 2	0	0	0		B 2	0	1.5	0.25
	B 3	0	0	0		B 3	0	0	0		B 3	0	0	1		B 3	0	0	0		B 3	0	0	0		B 3	0	5	0		B 3	0	0	0		B 3	0	1	0		B 3	0	0.75	0.125
	B 4	0	0	0		B 4	0	0	0		B 4	0	0	0		B 4	0	0	0		B 4	0	0	0		B 4	0	0	0		B 4	0	5	0		B 4	0	0	0		B 4	0	0.625	0
	B 5	0	0	0		B 5	0	0	0		B 5	0	0	2		B 5	0	0	0		B 5	0	0	0		B 5	0	5	0		B 5	0	1	0		B 5	0	2	0		B 5	0	1	0.25
	C 1	0	0	0		C 1	0	0	0		C 1	0	0	0		C 1	0	0	0		C 1	0	0	0		C 1	0	15	0		C 1	0	0	0		C 1	0	0	0		C 1	0	1.875	0
	C 2	0	0	0		C 2	0	0	0		C 2	0	0	0		C 2	0	0	0		C 2	0	0	0		C 2	0	3	0		C 2	0	0	0		C 2	2	6	0		C 2	0.25	1.125	0
	C 3	0	0	0		C 3	0	0	0		C 3	0	0	0		C 3	0	0	0		C 3	0	0	0		C 3	0	0	0		C 3	0	1	0		C 3	0	0	0		C 3	0	0.125	0
	C 4	0	0	0		C 4	0	0	0		C 4	0	0	0		C 4	0	0	0		C 4	0	0	0		C 4	0	2	0		C 4	0	0	0		C 4	0	0	0		C 4	0	0.25	0
	C 5	0	2	0		C 5	0	1	0		C 5	0	0	0		C 5	0	0	1		C 5	0	0	0		C 5	0	4	0		C 5	0	15	0		C 5	0	0	0		C 5	0	2.75	0.125
	D 1	0	0	0		D 1	0	0	0		D 1	0	0	0		D 1	0	0	0		D 1	0	0	0		D 1	0	1	0		D 1	0	0	0		D 1	0	0	0		D 1	0	0.125	0
	D 2	0	0	0		D 2	0	0	0		D 2	0	0	0		D 2	0	0	0		D 2	0	0	0		D 2	0	0	0		D 2	0	0	0		D 2	0	0	0		D 2	0	0	0
	D 3	0	0	0		D 3	0	0	0		D 3	0	0	1		D 3	0	0	0		D 3	1	0	0		D 3	0	1	0		D 3	0	6	0		D 3	0	0	0		D 3	0.125	0.875	0.125
	D 4	0	0	0		D 4	0	0	0		D 4	0	0	0		D 4	0	1	1		D 4	0	0	0		D 4	0	0	0		D 4	0	0	0		D 4	0	0	0		D 4	0	0.125	0.125
	D 5	1	0	0		D 5	0	0	0		D 5	0	0	0		D 5	0	0	0		D 5	0	0	0		D 5	0	0	0		D 5	0	5	0		D 5	0	0	0		D 5	0.125	0.625	0
	E 1	0	0	0		E 1	0	0	0		E 1	0	0	0		E 1	0	0	0		E 1	0	0	0		E 1	0	0	0		E 1	0	0	0		E 1	0	0	0		E 1	0	0	0
	E 2	0	0	0		E 2	0	0	0		E 2	0	0	0		E 2	0	0	0		E 2	0	0	0		E 2	0	0	0		E 2	0	0	0		E 2	0	0	0		E 2	0	0	0
	E 3	0	0	0		E 3	0	0	0		E 3	0	0	0		E 3	0	0	0		E 3	0	0	0		E 3	0	0	0		E 3	0	5	0		E 3	0	0	0		E 3	0	0.625	0
	E 4	0	0	0		E 4	0	0	0		E 4	0	0	0		E 4	0	0	0		E 4	0	0	0		E 4	0	0	0		E 4	0	0	0		E 4	0	0	0		E 4	0	0	0
	E 5	0	0	0		E 5	0	0	0		E 5	0	0	0		E 5	0	0	0		E 5	0	0	0		E 5	0	0	0		E 5	0	10	0		E 5	0	0	0		E 5	0	1.25	0
		Flow velocity							Depth
		1	2	3	4	5	Mean		1	2	3	4	5	Mean
	A 1	4	6	3	3	6	4.4		21	23	28	24.5	25	24.3
	A 2	4	6	3	2	2	3.4		28	25	23	27	28	26.2
	A 3	3.5	3	3	3	3	3.1		29	29	27	30	30	29
	A 4	1.5	2	2.5	2	2	2		26	33	25	26	28	27.6
	A 5	2	3	3	3	3	2.8		15	22	21	19	19.5	19.3
	B 1	3.5	3	3	4	2	3.1		30	25	28	31	25	27.8
	B 2	7	3	3	5	2	4		17	17	21	19.5	16	18.1
	B 3	3	4	4	5	3.5	3.9		16	15	14	16	18	15.8
	B 4	3	4	4.5	3	4	3.7		18	15	20	23	22	19.6
	B 5	3	5	3	3	3	3.4		9	18	17	16	15	15
	C 1	5	4	3	4	3	3.8		13	11	16	16	11	13.4
	C 2	5	3	6	4	10	5.6		10.5	10	10.5	11	11	10.6
	C 3	6	4	4	4	4.5	4.5		17	17	17	16	20	17.4
	C 4	5	3	4	4	3	3.8		18	21	19	19	18	19
	C 5	4	5	4	3	3	3.8		18	14	16	17	16	16.2
	D 1	3	3	2.5	3	2	2.7		24	20	23	19	22	21.6
	D 2	2.5	3	3	3	2	2.7		20	22	24	16.5	17	19.9
	D 3	3	3	2	2	2	2.4		9	4	12	16	18	11.8
	D 4	2	3	2.5	2	4	2.7		17	20	15	15	23	18
	D 5	3	5	5	4	3	4		16	15	16.5	17	19	16.7
	E 1	2	2	2	3	3	2.4		24	23	20.5	28	24	23.9
	E 2	2	2	2	3	2	2.2		25	22	23	17	24	22.2
	E 3	2	2	2	2	2	2		23	22	17	13	29	20.8
	E 4	1.5	2	2	2	2	1.9		22	28	27	25	20	24.4
	E 5	3	2.5	2	3	2	2.5		20	19	18	20	20	19.4

## Sheet: CC
2010-01-11								2010-01-11								2010-01-12								2010-01-12								2010-01-13	Schwefelwasser bis zur Brücke							2010-01-14	Schwefelwasser bis zur Brücke							MITTELWERTE
Uhrzeit 15:50	Molly			Bimaculata				Uhrzeit 16:30	Molly			Bimaculata				Uhrzeit 14:05	Molly			Bimaculata				Uhrzeit 16:30	Molly			Bimaculata				Uhrzeit 13:15	Molly			Bimaculata				Uhrzeit 14:45	Molly			Bimaculata					Größenkategorie Poecilia mexicana
Quadrant	< 1 cm	1 - 3 cm	> 3 cm	< 1 cm	1 - 3 cm	> 3 cm		Quadrant	< 1 cm	1 - 3 cm	> 3 cm	< 1 cm	1 - 3 cm	> 3 cm		Quadrant	< 1 cm	1 - 3 cm	> 3 cm	< 1 cm	1 - 3 cm	> 3 cm		Quadrant	< 1 cm	1 - 3 cm	> 3 cm	< 1 cm	1 - 3 cm	> 3 cm		Quadrant	< 1 cm	1 - 3 cm	> 3 cm	< 1 cm	1 - 3 cm	> 3 cm		Quadrant	< 1 cm	1 - 3 cm	> 3 cm	< 1 cm	1 - 3 cm	> 3 cm		Quadrant	< 1 cm
A 1	0	0	0	0	0	0		A 1	0	2	0	0	0	0		A 1	0	0	0	0	0	1		A 1	1	2	0	0	0	0		A 1	0	0	0	0	0	0		A 1	0	0	0	0	0	0		A 1	0.166667
A 2	0	0	0	0	0	0		A 2	0	0	0	0	0	0		A 2	0	5	0	0	0	0		A 2	0	0	1	0	0	0		A 2	0	0	0	0	0	0		A 2	0	0	0	0	0	0		A 2	0
A 3	0	0	0	0	0	0		A 3	0	0	0	0	0	0		A 3	0	0	0	0	0	0		A 3	0	0	0	0	0	0		A 3	0	0	0	1	0	0		A 3	0	0	0	0	0	0		A 3	0
A 4	0	0	0	0	0	0		A 4	0	0	0	0	0	0		A 4	0	0	0	0	0	0		A 4	0	0	0	0	0	0		A 4	0	0	0	0	0	0		A 4	0	0	0	1	0	0		A 4	0
A 5	0	0	0	0	0	0		A 5	0	0	0	0	0	0		A 5	0	0	0	1	0	0		A 5	0	0	0	1	0	0		A 5	0	0	0	0	0	0		A 5	0	0	0	2	0	0		A 5	0
A 6	0	0	0	0	0	0		A 6	0	0	0	0	0	0		A 6	0	0	0	5	0	0		A 6	4	0	0	4	0	0		A 6	0	0	0	5	3	0		A 6	0	0	0	1	0	0		A 6	0.666667
A 7	0	0	0	0	0	0		A 7	0	0	0	5	0	1		A 7	0	0	0	3	0	0		A 7	0	0	0	5	0	0		A 7	0	0	0	4	0	0		A 7	0	0	0	2	1	0		A 7	0
B 1	0	0	0	0	0	0		B 1	0	1	0	0	0	0		B 1	0	0	0	0	0	0		B 1	0	1	0	0	0	0		B 1	0	1	0	0	0	0		B 1	0	0	0	0	0	0		B 1	0
B 2	0	0	0	0	0	0		B 2	0	0	0	0	0	0		B 2	0	0	0	0	0	0		B 2	0	0	0	0	0	0		B 2	0	0	0	0	0	0		B 2	0	0	0	1	0	0		B 2	0
B 3	0	0	0	0	0	0		B 3	0	3	1	0	0	0		B 3	0	0	0	0	0	0		B 3	0	0	0	0	0	0		B 3	0	0	0	0	0	0		B 3	0	0	0	0	0	0		B 3	0
B 4	0	0	0	0	0	0		B 4	0	0	0	0	0	0		B 4	0	0	0	0	0	0		B 4	0	0	0	0	0	0		B 4	0	0	0	0	0	0		B 4	0	0	0	0	0	0		B 4	0
B 5	0	1	0	0	0	0		B 5	0	0	0	0	0	0		B 5	0	0	0	0	0	0		B 5	0	0	0	1	0	0		B 5	0	0	0	0	0	0		B 5	0	0	0	0	0	0		B 5	0
B 6	0	0	0	0	0	0		B 6	0	0	0	0	0	0		B 6	0	0	0	0	0	0		B 6	0	0	0	0	0	0		B 6	1	1	0	3	0	0		B 6	0	0	0	0	0	0		B 6	0.166667
B 7	0	0	0	0	0	1		B 7	1	2	0	0	0	0		B 7	0	0	1	0	0	0		B 7	0	0	0	0	0	0		B 7	0	0	0	0	0	0		B 7	0	0	0	1	0	0		B 7	0.166667
C 1	0	0	0	0	0	0		C 1	0	0	1	0	0	0		C 1	0	0	0	0	0	0		C 1	0	0	0	0	0	0		C 1	0	0	0	0	0	0		C 1	0	0	0	0	0	0		C 1	0
C 2	0	0	0	0	0	0		C 2	0	0	1	0	0	1		C 2	0	0	0	0	0	0		C 2	0	0	0	0	0	0		C 2	0	0	0	0	0	0		C 2	0	0	0	0	0	0		C 2	0
C 3	0	0	0	0	0	0		C 3	0	0	1	0	0	0		C 3	0	0	0	0	1	0		C 3	0	0	0	0	0	0		C 3	0	4	0	0	0	0		C 3	0	0	0	0	0	0		C 3	0
C 4	0	0	0	0	0	0		C 4	0	2	0	0	0	0		C 4	2	0	0	0	0	0		C 4	0	0	0	0	0	0		C 4	0	0	0	0	0	0		C 4	0	0	0	1	0	0		C 4	0.333333
C 5	0	0	0	0	1	0		C 5	0	0	0	0	0	0		C 5	0	0	0	0	0	0		C 5	0	0	0	0	0	0		C 5	0	0	0	0	0	0		C 5	0	0	0	0	0	0		C 5	0
C 6	0	0	0	0	0	0		C 6	0	1	0	0	0	0		C 6	0	0	0	0	0	0		C 6	0	0	0	0	0	0		C 6	0	0	0	0	2	2		C 6	0	0	0	0	0	0		C 6	0
C 7	0	1	0	0	0	1		C 7	1	0	1	0	0	0		C 7	0	0	0	0	0	0		C 7	0	0	0	0	0	0		C 7	0	0	0	0	0	0		C 7	0	0	0	0	0	0		C 7	0.166667
D 1	0	0	0	0	0	0		D 1	0	4	1	0	0	0		D 1	0	0	0	1	0	0		D 1	2	0	0	0	0	0		D 1	0	0	0	0	0	0		D 1	1	2	0	0	0	0		D 1	0.5
D 2	0	0	0	0	0	0		D 2	0	0	0	0	0	0		D 2	1	0	0	0	0	0		D 2	1	0	0	0	0	1		D 2	0	0	0	0	0	0		D 2	0	0	0	1	0	0		D 2	0.333333
D 3	0	0	0	0	0	0		D 3	0	0	0	0	0	0		D 3	0	0	1	0	0	0		D 3	0	0	0	0	0	0		D 3	0	0	0	0	0	0		D 3	0	0	0	0	0	0		D 3	0
D 4	0	0	1	0	1	0		D 4	0	0	0	0	0	0		D 4	0	2	0	0	0	0		D 4	0	0	0	0	0	0		D 4	0	0	0	0	0	0		D 4	0	0	0	0	0	0		D 4	0
D 5	0	0	0	0	0	0		D 5	0	0	0	0	0	0		D 5	0	0	0	0	1	0		D 5	0	0	0	0	0	0		D 5	2	1	0	0	0	0		D 5	0	0	0	0	0	0		D 5	0.333333
D 6	0	0	0	0	0	0		D 6	0	0	0	0	0	0		D 6	0	0	0	0	0	0		D 6	2	0	0	0	0	0		D 6	0	0	0	0	0	0		D 6	0	0	0	0	0	0		D 6	0.333333
D 7	0	0	0	0	0	0		D 7	0	0	0	0	0	0		D 7	0	0	0	0	0	0		D 7	0	0	0	0	0	0		D 7	0	0	0	0	0	0		D 7	0	0	0	0	0	0		D 7	0
			Flow velocity							Depth
			1	2	3	4	5	Mean		1	2	3	4	5	Mean
		A 1	60	60	60	60	60	60		21	24	25	23	23	23.2
		A 2	60	60	60	60	60	60		32	33	32	31	34	31.8
		A 3	60	60	60	60	60	60		36	37	36	35.5	36	36
		A 4	13	12	60	60	60	41		48	46	47	46	48	46.6
		A 5	22	20	14	12	12	16		46	46	50	49	47	48
		A 6	25	60	21	41	25	34.4		46	47	48	45	50	46.2
		A 7	60	60	60	60	60	60		32	38	44	46	48	41.2
		B 1	22	18	27	34	21	24.4		24	24	24.5	23.5	23	23.9
		B 2	22	20	26	26	34	25.6		32	31	30	29	30	30.2
		B 3	19	24	24	17	37	24.2		34	33.5	33	34.5	34	33.9
		B 4	16	25	17	23	16	19.4		44	43	42	42.5	41.5	42.8
		B 5	14	17	17	17	22	17.4		45	46.5	46.5	44	43	45.2
		B 6	11	13	9	11	15	11.8		47	45	47	46	49.5	46.2
		B 7	39	10	8	21	13	18.2		50	50	49	51.5	50	50.4
		C 1	21	60	20	60	23	36.8		24	25	24	24.5	23.5	24.4
		C 2	60	60	60	60	60	60		29	28	25	25	25.5	26.4
		C 3	22	60	60	60	60	52.4		32	33	30	29	31	30.6
		C 4	41	60	60	60	60	56.2		38	39	37.5	36.5	35.5	37.5
		C 5	60	60	60	60	60	60		38	38	34	35	36	36
		C 6	38	60	33	46	34	42.2		41	41	40	40	40	40.4
		C 7	42	30	50	40	41	40.6		47	45	43	45	49	45
		D 1	60	60	60	60	60	60		24.5	25.5	25.5	24	24.5	24.7
		D 2	60	60	60	60	60	60		18	17	19	20	16	18.8
		D 3	60	60	60	60	60	60		22	21	24	15	16.5	19.4
		D 4	60	60	60	60	60	60		29	21.5	15	17	27	19.9
		D 5	60	60	60	60	60	60		27	25.5	15	15	22	19.5
		D 6	60	60	60	60	60	60		31	30	24.5	24	28	26.7
		D 7	60	60	60	60	60	60		41	48	29	32	27	36.4
[truncated: 5 more columns]

## Sheet: EA-con
	2010-01-13	Schwefelwasser bis zur Brücke				2010-01-13	Schwefelwasser bis zur Brücke				2010-01-14	Schwefelwasser bis zur Brücke					2010-01-14	Schwefelwasser bis zur Brücke				2010-01-17					MITTELWERTE
	Uhrzeit 13:53	Molly				Uhrzeit 15:05	Molly				Uhrzeit 13:50	Molly			Bimaculata		Uhrzeit 15:45	Molly				Uhrzeit 12:47:00	Größenkategorie Poecilia mexicana					Größenkategorie Poecilia mexicana
	Quadrant	< 1 cm	1 - 3 cm	> 3 cm		Quadrant	< 1 cm	1 - 3 cm	> 3 cm		Quadrant	< 1 cm	1 - 3 cm	> 3 cm			Quadrant	< 1 cm	1 - 3 cm	> 3 cm		Quadrant	< 1 cm	1 - 3 cm	> 3 cm		Quadrant	< 1 cm	1 - 3 cm	> 3 cm
	A 1	0	0	1		A 1	0	1	0		A 1	0	0	0			A 1	0	0	0		A 1	0	5	0		A 1	0	1.2	0.2
	A 2	0	0	0		A 2	0	0	1		A 2	0	0	0			A 2	0	5	0		A 2	0	7	0		A 2	0	2.4	0.2
	A 3	0	0	1		A 3	0	1	1		A 3	0	0	0			A 3	0	3	0		A 3	0	7	0		A 3	0	2.2	0.4
	A 4	0	6	0		A 4	0	20	0		A 4	0	1	0			A 4	0	2	0		A 4	0	20	0		A 4	0	9.8	0
	A 5	0	15	0		A 5	0	7	0		A 5	0	1	0			A 5	0	10	0		A 5	0	4	0		A 5	0	7.4	0
	B 1	0	0	0		B 1	0	0	0		B 1	0	0	1			B 1	0	0	0		B 1	0	25	5		B 1	0	5	1.2
	B 2	0	0	0		B 2	0	5	0		B 2	0	0	0			B 2	0	10	0		B 2	0	5	0		B 2	0	4	0
	B 3	0	6	0		B 3	0	9	0		B 3	0	8	1			B 3	0	5	0		B 3	0	10	0		B 3	0	7.6	0.2
	B 4	2	3	0		B 4	0	8	0		B 4	0	8	1			B 4	0	15	0		B 4	0	10	0		B 4	0.4	8.8	0.2
	B 5	0	5	0		B 5	0	10	0		B 5	0	5	0			B 5	0	15	0		B 5	0	20	0		B 5	0	11	0
	C 1	0	0	0		C 1	0	25	0		C 1	0	1	0			C 1	10	15	0		C 1	0	25	0		C 1	2	13.2	0
	C 2	0	0	0		C 2	5	0	0		C 2	10	0	1			C 2	0	10	0		C 2	0	15	1		C 2	3	5	0.4
	C 3	0	0	0		C 3	15	5	0		C 3	0	30	1			C 3	0	0	0		C 3	5	20	0		C 3	4	11	0.2
	C 4	30	0	0		C 4	0	7	0		C 4	0	10	7			C 4	0	7	0		C 4	0	15	0		C 4	6	7.8	1.4
	C 5	0	20	0		C 5	0	10	0		C 5	0	12	1	1 mittel		C 5	0	20	0		C 5	0	25	0		C 5	0	17.4	0.2
	D 1	50	0	0		D 1	40	0	0		D 1	15	1	0	1 großer		D 1	70	0	0		D 1	50	10	1		D 1	45	2.2	0.2
	D 2	70	0	0		D 2	80	2	0		D 2	120	0	0			D 2	60	10	0		D 2	50	10	2		D 2	76	4.4	0.4
	D 3	50	0	0		D 3	25	0	0		D 3	100	0	0			D 3	40	0	0		D 3	20	10	0		D 3	47	2	0
	D 4	40	0	0		D 4	40	25	0		D 4	40	10	0			D 4	20	15	0		D 4	20	15	0		D 4	32	13	0
	D 5	20	0	0		D 5	10	25	0		D 5	2	8	0	3 kleine		D 5	20	10	0		D 5	30	50	0		D 5	16.4	18.6	0
	E 1	1	0	0		E 1	30	0	0		E 1	30	2	1			E 1	10	0	0		E 1	20	0	0		E 1	18.2	0.4	0.2
	E 2	2	0	0		E 2	25	0	0		E 2	20	0	0			E 2	20	0	0		E 2	5	0	0		E 2	14.4	0	0
	E 3	0	0	0		E 3	40	2	0		E 3	10	1	0			E 3	30	0	0		E 3	50	2	0		E 3	26	1	0
	E 4	2	0	0		E 4	20	0	0		E 4	20	1	0			E 4	25	0	0		E 4	40	0	2		E 4	21.4	0.2	0.4
	E 5	2	0	0		E 5	10	2	0		E 5	10	0	0			E 5	20	5	0		E 5	10	0	0		E 5	10.4	1.4	0
		Flow velocity							Depth
		1	2	3	4	5	Mean		1	2	3	4	5	Mean
	A 1	3	2	2	2	2	2.2		20	22	18	17	21.5	19.7
	A 2	2	2	2	2	2	2		18	18	17.5	18.5	19.5	18.3
	A 3	2	2	2	2	2	2		12	18.5	19	19	18	17.3
	A 4	2	2	2	2	3	2.2		14	13	15.5	17.5	20	16
	A 5	2	2	2	2	2	2		6	12	14	14	13	11.8
	B 1	2	2	3	3	2	2.4		24	21	21.5	23	22	22.3
	B 2	3	2	2	2	2	2.2		19.5	19	17	20.5	18	18.8
	B 3	3	2	2	3	3	2.6		20	17.5	16	19	19.5	18.4
	B 4	2	2	2	3	2	2.2		14	13	16	13	13	13.8
	B 5	3	2	2	2	2	2.2		13	14	13	12	11.5	12.7
	C 1	3	3	3	3	2	2.8		16	15	20	19.5	18	17.7
	C 2	3	2	2	2	3	2.4		22.5	23	21.5	20.5	22	21.9
	C 3	2	2	3	3	3	2.6		19.5	20.5	17	18	17	18.4
	C 4	2	2	2	2	2	2		18	15.5	12.5	17.5	18	16.3
	C 5	2	2	2	2	3	2.2		14.5	15	13.5	13	12	13.6
	D 1	5	5	6	5	4	5		17	14.5	15	17	17	16.1
	D 2	3	4	5	4	4	4		21	21.5	19.5	21.5	21	20.9
	D 3	3	4	3	3	4	3.4		20.5	21	19	18	20	19.7
	D 4	3	3	2	2	3	2.6		13.5	18	18	18	13	16.1
	D 5	3	3	3	3	3	3		20	18	15	12	15	16
	E 1	60	60	60	60	60	60		10	14	24	21	15	16.8
	E 2	60	60	60	60	60	60		20	22	22	24	26	22.8
	E 3	60	60	60	60	60	60		21	21	21	22	20	21
	E 4	13	19	25	60	60	35.4		19	18.5	17.5	18	20	18.6
	E 5	35	60	37	35	29	39.2		16.5	11	8	9	14	11.7

## Sheet: CX
	2010-01-14					2010-01-14					2010-01-14					2010-01-17					2010-01-18					2010-01-18					MITTELWERTE
	Uhrzeit 13:20:00	Größenkategorie Poecilia mexicana				Uhrzeit 14:00:00	Größenkategorie Poecilia mexicana				Uhrzeit 15:10:00	Größenkategorie Poecilia mexicana				Uhrzeit 13:38:00	Größenkategorie Poecilia mexicana				Uhrzeit 13:30	Größenkategorie Poecilia mexicana				Uhrzeit 15:30	Größenkategorie Poecilia mexicana					Größenkategorie Poecilia mexicana
	Quadrant	< 1 cm	1 - 3 cm	> 3 cm		Quadrant	< 1 cm	1 - 3 cm	> 3 cm		Quadrant	< 1 cm	1 - 3 cm	> 3 cm		Quadrant	< 1 cm	1 - 3 cm	> 3 cm		Quadrant	< 1 cm	1 - 3 cm	> 3 cm		Quadrant	< 1 cm	1 - 3 cm	> 3 cm		Quadrant	< 1 cm	1 - 3 cm	> 3 cm
	A 1	5	5	3		A 1	1	4	0		A 1	0	1	0		A 1	0	1	1		A 1	3	3	0		A 1	3	2	0		A 1	2	2.66667	0.666667
	A 2	5	5	5		A 2	5	5	1		A 2	0	2	1		A 2	3	1	1		A 2	2	1	0		A 2	0	4	0		A 2	2.5	3	1.33333
	A 3	2	3	0		A 3	0	2	0		A 3	3	0	1		A 3	3	2	5		A 3	2	5	1		A 3	0	0	0		A 3	1.66667	2	1.16667
	A 4	1	0	1		A 4	0	3	0		A 4	2	2	1		A 4	2	1	1		A 4	2	0	0		A 4	0	1	1		A 4	1.16667	1.16667	0.666667
	A 5	0	0	2		A 5	0	1	0		A 5	6	5	2		A 5	2	0	2		A 5	2	1	1		A 5	0	0	1		A 5	1.66667	1.16667	1.33333
	B 1	5	10	7		B 1	0	3	0		B 1	15	16	7		B 1	0	5	2		B 1	2	4	0		B 1	3	2	2		B 1	4.16667	6.66667	3
	B 2	4	5	3		B 2	0	2	0		B 2	0	0	0		B 2	5	5	5		B 2	0	5	1		B 2	2	2	1		B 2	1.83333	3.16667	1.66667
	B 3	2	2	0		B 3	3	5	0		B 3	1	3	1		B 3	0	1	1		B 3	3	5	0		B 3	0	2	0		B 3	1.5	3	0.333333
	B 4	0	1	0		B 4	0	1	1		B 4	3	1	0		B 4	5	1	2		B 4	2	1	0		B 4	0	3	0		B 4	1.66667	1.33333	0.5
	B 5	2	0	2		B 5	1	2	0		B 5	0	2	2		B 5	4	0	0		B 5	1	2	2		B 5	0	0	3		B 5	1.33333	1	1.5
	C 1	0	10	5		C 1	2	5	2		C 1	0	5	2		C 1	3	10	5		C 1	3	5	1		C 1	0	6	3		C 1	1.33333	6.83333	3
	C 2	0	10	2		C 2	2	3	1		C 2	1	5	1		C 2	20	10	5		C 2	0	5	5		C 2	2	2	0		C 2	4.16667	5.83333	2.33333
	C 3	5	3	3		C 3	2	2	0		C 3	0	2	0		C 3	0	1	4		C 3	5	1	1		C 3	0	1	2		C 3	2	1.66667	1.66667
	C 4	0	2	1		C 4	2	2	0		C 4	0	3	4		C 4	3	0	2		C 4	1	3	0		C 4	0	2	0		C 4	1	2	1.16667
	C 5	0	2	2		C 5	0	7	4		C 5	0	3	2		C 5	1	2	0		C 5	3	3	2		C 5	0	2	2		C 5	0.666667	3.16667	2
	D 1	0	15	15		D 1	1	10	5		D 1	0	0	9		D 1	0	20	20		D 1	5	20	1		D 1	0	10	4		D 1	1	12.5	9
	D 2	0	10	5		D 2	1	3	0		D 2	3	6	1		D 2	10	25	20		D 2	0	15	5		D 2	0	3	1		D 2	2.33333	10.3333	5.33333
	D 3	0	8	0		D 3	0	2	0		D 3	0	6	2		D 3	4	7	0		D 3	1	2	2		D 3	1	1	3		D 3	1	4.33333	1.16667
	D 4	0	2	3		D 4	0	8	4		D 4	0	5	3		D 4	5	3	5		D 4	0	2	1		D 4	1	1	3		D 4	1	3.5	3.16667
	D 5	0	3	1		D 5	3	8	2		D 5	0	0	1		D 5	0	1	1		D 5	0	10	3		D 5	0	0	4		D 5	0.5	3.66667	2
	E 1	0	10	15		E 1	0	15	10		E 1	0	0	15		E 1	0	3	10		E 1	2	10	10		E 1	0	5	5		E 1	0.333333	7.16667	10.8333
	E 2	0	15	5		E 2	2	10	5		E 2	0	4	7		E 2	0	10	20		E 2	0	15	5		E 2	0	15	5		E 2	0.333333	11.5	7.83333
	E 3	0	20	14		E 3	0	5	3		E 3	0	10	3		E 3	3	10	25		E 3	0	15	3		E 3	0	4	3		E 3	0.5	10.6667	8.5
	E 4	0	25	15		E 4	0	5	3		E 4	0	4	0		E 4	0	5	6		E 4	3	5	7		E 4	0	1	1		E 4	0.5	7.5	5.33333
	E 5	0	10	1		E 5	1	3	0		E 5	0	0	2		E 5	0	4	1		E 5	0	10	1		E 5	0	3	0		E 5	0.166667	5	0.833333
		Flow velocity							Depth
		1	2	3	4	5	Mean		1	2	3	4	5	Mean
	A 1	5	10	13	7	5	8		5.5	5.5	6.5	6	6	5.9
	A 2	5	5	2	5	5	4.4		6.5	7	7	7	6	6.7
	A 3	4	5	2	8	4	4.6		5	6.5	5	5.5	6.5	5.7
	A 4	4	4	5	5	4	4.4		3.5	4	5	5	5	4.5
	A 5	5	4	6	7	8	6		5	4.5	4	4	4	4.3
	B 1	4	4	4	4	8	4.8		5.5	6	7.5	6.5	6.5	6.4
	B 2	3	4	3	3	3	3.2		6.5	7.5	6.5	6.5	7.5	6.9
	B 3	3	2	2	2	3	2.4		6.5	6	5	5.5	6.5	5.9
	B 4	20	7	4	12	16	11.8		6	3	6	6	4.5	5.1
	B 5	9	9	7	4	5	6.8		6.5	6	7	7	7	6.7
	C 1	13	3	3	4	6	5.8		8	7	8	8.5	8	7.9
	C 2	4	2	2	2	4	2.8		6	6	7	6.5	7.5	6.6
	C 3	5	4	5	4	6	4.8		7	5.5	5	5	4.5	5.4
	C 4	9	8	8	6	6	7.4		4	6.5	6	4.5	6	5.4
	C 5	3	4	5	5	5	4.4		7.5	7	7	7	6.75	7.05
	D 1	3	3	4	2	2	2.8		7	8	7	7	7.5	7.3
	D 2	3	2	3	2	2	2.4		6	5	6.5	6	6	5.9
	D 3	11	9	14	14	15	12.6		6.5	5.5	6	6	6.5	6.1
	D 4	4	3	6	3	3	3.8		7.5	7.5	7	7	7	7.2
	D 5	3	2	2	2	2	2.2		7	6	7.5	7	7	6.9
	E 1	1	7	60	5	4	15.4		4	12	16	13.5	10	11.1
	E 2	3	3	4	3	2	3		11	10	7	7.5	6.5	8.4
	E 3	19	7	10	60	11	21.4		9	8	10.5	8	8	8.7
	E 4	1	2	2	2	2	1.8		8	8.5	8	8	7	7.9
	E 5	2	2	2	2	2	2		7	8	8	7.5	7.5	7.6

## Sheet: MDS_BrayCurtis
	Final Coordinates
		Dimension
		1	2	sites	sample day	Clustereinteilung nach Two-Step-Clusteranalyse
	a	-0.585323	0.299542	1	1	2
	b	-0.685468	0.00558869	1	2	2
	c	-0.665573	-0.0609236	1	3	2
	d	-0.625568	0.0105346	1	4	2
	e	-0.659613	-0.0999191	1	5	2
	f	-0.571937	0.114183	1	6	2
	g	-0.66404	-0.12094	1	7	2
	h	-0.688802	-0.32843	1	8	2
	i	-0.699191	-0.451044	2	1	2
	j	-0.691739	-0.324113	2	2	2
	k	-0.687273	-0.409984	2	3	2
	l	-0.68633	-0.181132	2	4	2
	m	-0.653564	-0.576482	2	5	2
	n	-0.678629	-0.284193	2	6	2
	o	-0.628524	0.0528268	3	1	2
	p	-0.614498	0.015433	3	2	2
	q	-0.63671	-0.133936	3	3	2
	r	-0.189742	0.439745	3	4	3
	s	-0.651183	-0.134493	3	5	2
	t	-0.560257	0.0507029	3	6	2
	u	0.885662	0.126935	4	1	1
	v	0.913778	-0.0479631	4	2	1
	w	0.839995	-0.125538	4	3	1
	x	0.828617	-0.201401	4	4	1
	y	0.762705	-0.21614	4	5	1
	z	0.900013	0.0158867	5	1	1
	ab	0.87343	-0.0516307	5	2	1
	ac	0.820521	-0.109564	5	3	1
	ad	0.78732	-0.153115	5	4	1
	ae	0.7742	-0.199191	5	5	1
	af	0.47361	-0.104174	5	6	1
	ag	0.41309	-0.06369	5	7	1
	ah	0.649625	-0.29636	5	8	1
	ai	0.883808	0.0418261	6	1	1
	aj	0.74233	0.0532737	6	2	1
	ak	0.766679	-0.0790564	6	3	1
	al	0.736106	-0.127324	6	4	1
	am	0.730559	-0.170015	6	5	1
	an	0.740356	-0.209255	6	6	1
	ao	-0.385378	0.349003	7	1	3
	ap	-0.475405	0.171699	7	2	2
	aq	-0.447579	0.170408	7	3	2
	ar	-0.449604	0.172368	7	4	2
	as	-0.50344	0.063475	7	5	2
	at	-0.123436	0.61884	8	1	3
	au	0.0928475	0.522373	8	2	3
	av	0.129162	0.522632	8	3	3
	aw	-0.100518	0.562482	8	4	3
	ax	-0.00676182	0.45519	8	5	3
	ay	0.271672	0.425059	8	6	3
